# Supplementary material
Source: PubMed Central journal article supplement (PMC3981173)

Figure 3 A

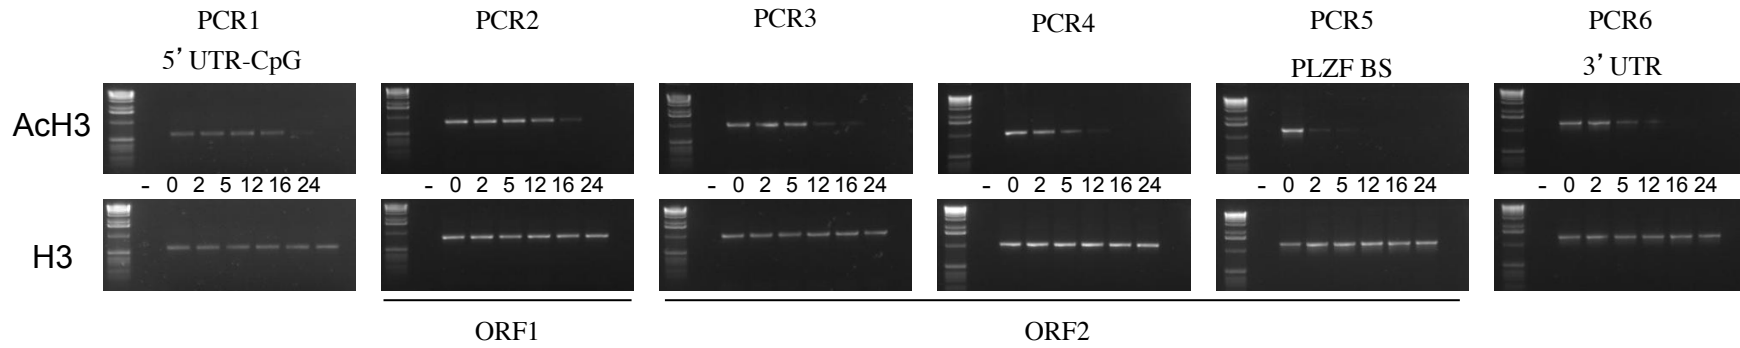

Figure 3 B

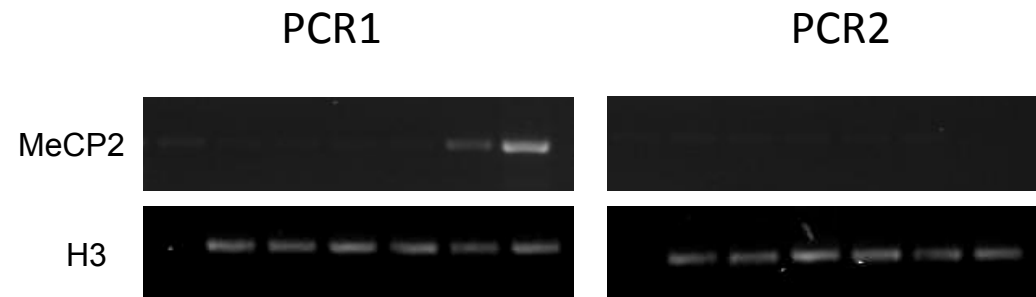

Figure 3 C

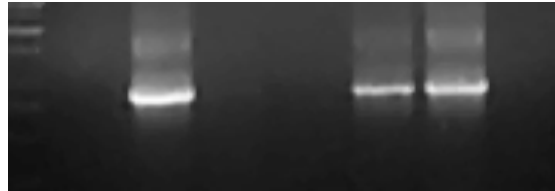

Figure 3 D

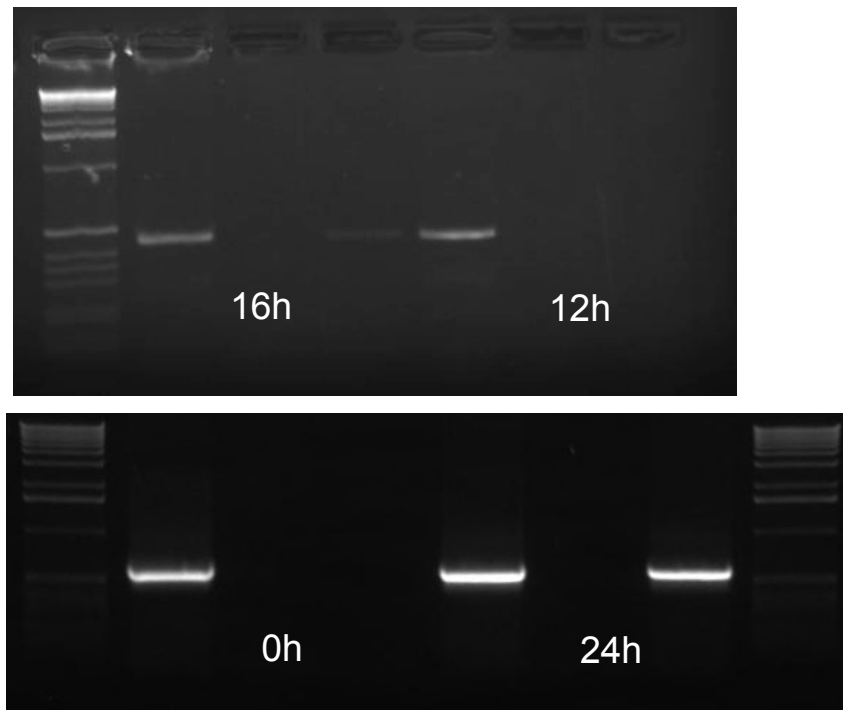

Figure 3 F

0-Mix  
1-Input  
2-anti-histone H3  
3- IgG control  
4-anti-PLZF  
5-anti-Ac histone H3

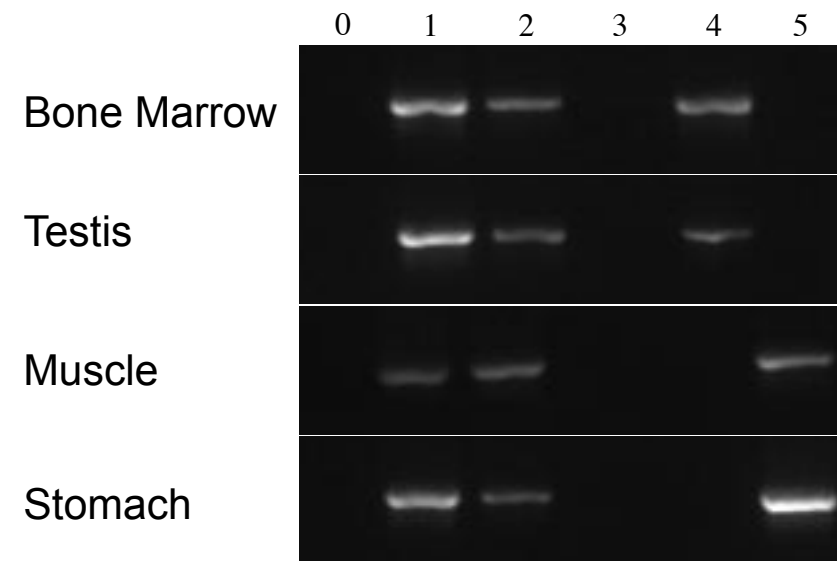

Supplement: emboj2013118df3.pdf [file emboj2013118df3.pdf]
