# Supplementary material
Source: PubMed Central journal article supplement (PMC3981173)
Supplement: emboj2013118s1.pdf [file emboj2013118s1.pdf]

## Materials and methods

### Reagents and Antibodies

Antibodies were purchased from companies: histone H3 and acetylated histone H3, Upstate Biotechnology (Buckingham, UK); p300, HDAC1, PLZF and IRP-1 Santa Cruz (Heidelberg, Germany); DNMT1, MeCP2, MBD1,  $\beta$ -actin (ChIP grade antibodies from Abcam, (Cambridge, UK); horseradish peroxidase-conjugated antibodies were from DakoCytomation (Saxvågen, Sweden). The LightShift® Chemiluminescent EMSA Kit (Pierce) was employed according to manufacturer's instructions for detection of immobilized nucleic acids and biotinylated proteins.

**Immunoblotting.** Nuclear extracts were prepared from transfected 293T, KG1 cells or from mouse tissues (*I* and described in Chromatin immunoprecipitation section), analyzed by SDS-PAGE, and visualized by Western blotting using monoclonal Anti-PLZF or beta-actin for detection. Blots were developed with the ECL kit (Amersham Pharmacia).

**Expression and reporter plasmids.** PLZF, PLZF<sup>MUT</sup> (PLZF lacking the ability to bind DNA), cDNA expression vectors, have been previously described (2 and references within).

The tk-luc reporter plasmids were derived from the pT109luc plasmid by inserting the L1 PLZF DNA binding sequences upstream of the minimal herpes simplex virus thymidine kinase promoter. The PCR inserts were cloned into the *Bam*HI and *Sal*I sites of the polylinker in the pT109 plasmid or into the *Sac*I and *Sal*I sites of the polylinker in the pt109 plasmid containing five GAL4 binding sites cloned into the *Bam*HI and *Sal*I of the polylinker (described in MCB). Mutations within the PLZF binding site were generated by PCR amplification in conjunction with the Quickchange site-directed mutagenesis kit (Stratagene) using primers (derived from sequences from the L1 genomic region) 5'-ctgtttatatgctgctgtattcccttattgattgcgtatattgaa-3' (forward) and 5'-ttcaatatacgcaaatcaataaggggaatacagcatataaacag-3' (reverse).

**Cell culture and transient transfection.** Transient transfections using 293T cells (*I*), maintained in Dulbecco's modified Eagle's medium with 100 U/ml penicillin, 100  $\mu$ g/ml streptomycin, 20 mM glutamine, and 10% fetal calf serum, were performed using the calcium phosphate precipitation method (Promega) as previously described (*I,2*). KG1 cells were grown in RPMI 1640 media (Life Technologies Ltd, Paisley, UK) containing 100 U/ml penicillin, 100  $\mu$ g/ml streptomycin, 20 mM glutamine, and 10% fetal calf serum, in a humidified atmosphere of 95% O<sub>2</sub> and 5% CO<sub>2</sub> at 37°C. BlueScribe M+ DNA was used as a carrier to equalize the total amount of transfected DNA. In all co-transfection experiments, the total amount of transfected mammalian expression vector was kept constant. All transfections were performed at least three times.

**L1-EGFP transposition assay.** Transient transfections using 293T cells were performed using the calcium phosphate precipitation method. On day 0, 1x10<sup>4</sup> 293T cells were transfected with 0.350  $\mu$ g of L1-EGFP (EF06R) with or without expression vectors (0.1  $\mu$ g) and with carrier DNA to a total of 0.5  $\mu$ g in total. Heat shock was carried out on day 7 for 20 minutes at 42°C and cells were returned to culture to recover overnight. On day 8, cells were harvested and the percentage of EGFP+ cells analyzed by flow cytometry (BD FACSCaliber), gating on live cells by forward/side scatter and propidium iodide/AnnexinV exclusion (as described in the Annexin V apoptotic detection Kit APC, eBioscience). All transfections were performed at least three times.

### Colony-forming assays

Mouse bone marrows from wild type and PLZF knock-in mice were plated in methylcellulose media (Methocult M3434; StemCell Technologies) according to the manufacturer's directions, and colonies were scored at 12 to 14 days. Images of colonies were obtained using a Nikon TE200 inverted microscope (Nikon Instruments Inc). For each replating, 10,000 cells were replated in methylcellulose and total number of colonies was determined after 10 days.

### Chromatin immunoprecipitation (ChIP) and sequential ChIP assays (Primers list).

L1\_F2 5'-acaaatggaaatcctggaggt-3' (forward) and 5'-ctttctagacctctcttagt-3' (reverse),

L1\_F10 5'-ttgagcctatgtgtgtctct-3' (forward) and 5'-ctttctggctactgacctata-3' (reverse),  
 L1\_F15 5'-taaggagattttgggctgaga-3' (forward) and 5'-attcctcgacacatacactct-3' (reverse),  
 L1\_PCR1 5'-gccaagatggccgaataggaa-3' (forward) and 5'-gaggttactgctgtcttttg-3' (reverse),  
 L1\_PCR2 5'-caaaaagacagcagtaacctc-3' (forward) and 5'-ttggtctttcacatagtc-3' (reverse),  
 L1\_PCR3 5'-gggactatgtgaaaagaccaa-3' (forward) and 5'-ggatagttagctcctctgtt-3' (reverse),  
 L1\_PCR4 5'-aacaagaggagcctaactatcc-3' (forward) and 5'-ctgttattggcgcattcagag-3' (reverse),  
 L1\_PCR5 5'-ctctgaatcgaccaataacag-3' (forward) and 5'-cttaggattgacttggaatg-3' (reverse),  
 L1\_PCR6 5'-cattgccaagtcaatcctaag-3' (forward) and 5'-tctcattgtcaattcccacc-3' (reverse),  
 and mouse L1\_PCR5 5'-ccattcctctgaaactattc-3' (forward) and 5'-tgaataccctttatttccttc-3' (reverse).

### Methylation-specific PCR

A total of approximately 250ng of KG1 genomic DNA with sufficient purity was digested with 100 U of the CpG-methylation blocked restriction enzyme *ScrfI* and the insensitive *XbaI* (New England Biolabs, Beverly, MA, USA) at 37°C for 2 hours before being precipitated. Samples were resuspended with distilled H<sub>2</sub>O at a concentration of 50ng/μl. For subsequent PCR analysis, aliquots containing 100ng of native or predigested DNA were used as template for each reaction. The primer pairs chosen (5'- gccaagatggccgaataggaa -3' and 5'- gaggttactgctgtcttttg -3') flanked *ScrfI* and *XbaI* restriction sites within the L1 5'UTR-CpG island region. PCR was performed with the Expand Long Template PCR System (Roche, Germany) in a final volume of 50μl containing, 30 pmol of primers, 200 mM nucleotides, and 3.5U of genomic polymerase mix. Reactions were performed according to the manufacturer's protocol. Subsequently, the 559-bp-long PCR product was analyzed on an ethidium bromide-stained 1% agarose gel. Specificity and sensitivity of the methylation-specific PCR were determined in control samples with a defined methylation status. Undigested genomic DNA, which resembles a fully methylated status, served as a positive control. For the corresponding controls, genomic DNA was predigested with the CpG-methylation insensitive *XbaI* or a non-cutting *XhoI* endonucleases, which mimics an unmethylated or methylated promoter status respectively and control of successful enzymatic digestion. As a control for a hypomethylated sequence, we used genomic DNA derived from untransfected 293T cells (No PLZF lane).

### Real-time PCR

Total RNA was isolated from tissues and cell lines using the Trizol reagent (Gibco BRL). Cells were homogenised in Trizol with a dounce homogenizer and RNA was extracted following the manufacturer's suggested protocol. RNA was resuspended in 10mM Tris (pH 7.5) and the concentration was determined by absorbance at 260 nm. One microgram of total RNA was reverse-transcribed using Moloney Murine Leukemia reverse transcriptase (M-MLV-RT; Gibco BRL) and random hexamers primers (Amersham), as suggested by the manufacturer's instructions.

Real-time PCR was performed using an ABI 7700 Sequence Detection System (PE Applied-Biosystems) in the presence of SYBR-green. The optimisation of the real-time PCR reaction was performed according to manufacturer's instructions (PE Applied-Biosystems, User Bulletin 2 applied to the SYBR-Green I core reagent protocol) but scaled down to 25 μl per reaction. The PCR conditions were standard (SYBR-Green I core reagent protocol) and all reagents were provided in the *FullVelocity*<sup>TM</sup> SYBR® Green QPCR Master Mix (Stratagene). cDNA produced from the equivalent of 50 ng of RNA was analyzed in triplicate. After optimisation, nucleotides were used at various concentrations for the detection and quantification of *PLZF* (5'-ttactggctcattcagcggt-3' (forward), 5'-cactcaaagggtcttcacct-3' (reverse)), *ORF1* (5'-acttcccaaatcttaaa-3' (forward), 5'-aaaagtctggtgtaatt-3' (reverse)), (reverse)) and *ABL* (5'-caaatccaagaaggggctctct-3' (forward), 5'-tcgagctgcttcgctgaga-3' (reverse)). *PLZF* and *ORF1* expression was normalized to the expression of *ABL* as the housekeeping genes.

Murine nucleotides primers were used at various concentrations for the detection and quantification of GAPDH, signal and coding of PLZF, c-kit, CRABP1, myc, and L1 ORF2: GAPDH 5'-GCACAGTCAAGGCCGAGAAT-3' and 5'-GCCTTCTCCATGGTGGTGAA-3' PLZF 5'-ACCAGTGTACCATCTGCACG and 5'-CTGCTCTACCATGTGTTGGG C-kit 5'-AGAAGCAGATCTCGGACAGC and 5'-CATCACAGAAGCCAGAAGGAC CRABP1 5'-CAA CTT CAA GGT CGG AGA GG and 5'- CAA GGG TAC ACA AGG CAA CA Myc 5'-TCACCAGCACAACTACGCCG and 5'-CAGGATGTAGGCGGTGGCTT ORF2 5'-ACTTCCCAAATCTTAAA-3' and 5'-AAAAGTCTGGTGTAAAT-3'

### **Production of RNA templates**

To create short (96bp) or long (188bp) RNA templates forward primers containing the T7 promoter were used in a PCR amplification on the L1 EF06R plasmid, short forward 5'-cgccgaatacagactcactatagatgcaaggctggttcaatata-3', short reverse 5'-catctattgagataatcatgtggtttt-3', long forward ttccgtaatacagactcactagggcttatccaccatgatcaagtgggc-3', long reverse 5'-taattattgagagtttttagcat-3'. *In vitro* transcription was done according to the manufacturer's protocol (mMESSAGE mMACHINE® kit, Ambion, Applied-Biosystems) and RNA oligonucleotides were purified with Ambion NucAway Spin columns. For biotin labelling 2µl of Biotin RNA labelling mix were added to the reaction (Roche). Successful *in vitro* transcription was monitored by running an aliquot of the reaction on 10% denaturing gel, staining with ethidium bromide, and subsequent UV detection. RNA concentration was assessed by A280 absorbance on a Nanodrop (Pepqlab).

RNA EMSA was performed according to the LightShift® Chemiluminescent EMSA Kit (Pierce) with modification of the PLZF binding reaction described in (2).

### **RNA Pull-Down (RIP-Chip), primers list.**

Human LINE1 primers: first round, 5'-ccattccttctgaaactattc-3' (forward) and 5'-tgaataccctttatttcttc-3' (reverse); second round, 5'-cagagacacacacaaaaaaga-3' (forward) and 5'-aaaggggaatgcttccagtttt-3' (reverse).

Mouse LINE1 primers: first round, 5'-ccagtcttcacaaactattc-3' (forward) and 5'-tgtatccccttgatctccttt-3' (reverse); second round, 5'-aaaagatccaacaaagataga-3' (forward) and 5'-agtgaggattgcttccagcttc-3' (reverse).

Human CDC14 primers: first round, 5'-taccctgagctcaacaataat-3' (forward) and 5'-acttccaaaagaatgaactg-3' (reverse); second round, 5'-atctctgccttcttaccta-3' (forward) and 5'-gtttctccttacttcttctt-3' (reverse).

To ensure that RNA samples had no genomic contamination, DpnI endonuclease pre-digested samples were assessed by PCR. Furthermore, pre-treatment with RNase A (Roche) of the immunoprecipitated purified RNA particles, was carried out to assess that amplified products were only amplified from RNA template.

### ***In vitro* translation protocol**

Long ORF2 RNA templates (500 ng) were used as a template to translate ORF2 peptides *in vitro* using the T7 TNT coupled transcription-translation system (Promega), following the supplier's directions and addition of Transcend™ tRNA (Promega) in the reaction buffer to order to biotinylate lysine residues for detection (see Reagents and Antibodies). Furthermore, the translation reaction was complemented with either unprogrammed rabbit reticulocyte lysate or PLZF protein generated using the *in vitro* translation system. Biotinylated peptides were detected by Western blotting followed by chemiluminescence.

### **MeDIP and second generation sequencing**

Control and target gene primers to test MeDIP:

Actin 5'-AGCCAACTTTACGCCTAGCGT and 5'-TCTCAAGATGGACCTAATACGGC

GAPDH 5'-CTCTGCTCCTCCCTGTTCC and 5'-TCCCTAGACCCGTACAGTGC

H19-ICR 5'-GCATGGTCCTCAAATTCTGCA and 5'-GCATCTGAACGCCCAATTA

IAP (repeat) 5'-CTCCATGTGCTCTGCCTTCC and 5'-CCCCGTCCCTTTTTTAGGAGA  
L1 5'LTR 5'-AAAGATCCAACAAAGATAGA and 5'-AGTGGGATTGCTTCCAGCTTC  
myc 5'-CCGAACAACCGTACAGAAAG and 5'-CCGGGGTGTAACAGTAATAG  
CRABP1 5'- AACGCCAGTCTCTCTGCAAC and 5'- CTCTGTACCAGCTTACCCAAC  
c-kit 5'-AAAGAGCGGCAGACAAGAGGAC and 5'-CGGCACAAAAGCATCACCAAAC

Supplementary figures

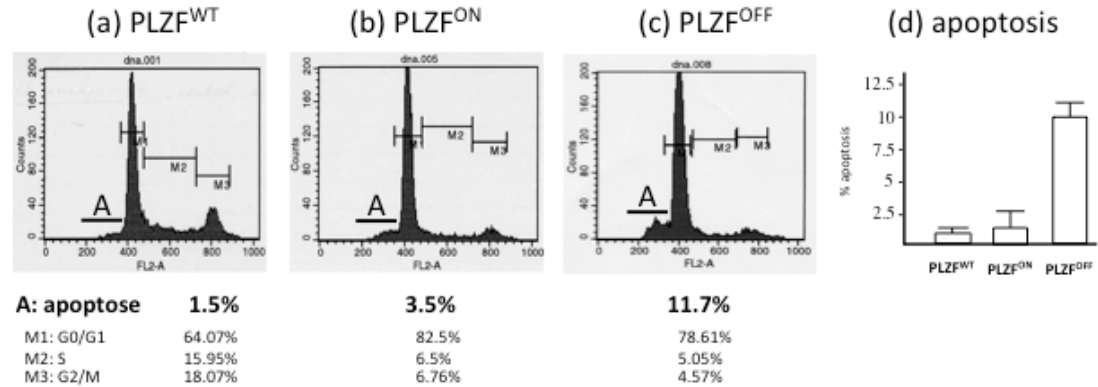

**Supplementary Figure S1-1: PLZF<sup>ON</sup> acetylation mutant expression is associated with increased spontaneous apoptosis in purified testicular cells.** Flow cytometric analysis of percentage apoptosis in testicular cells purified from (a) PLZF<sup>WT</sup>, (b) PLZF<sup>ON</sup> and (c) PLZF<sup>OFF</sup> mice. DNA content of cells was estimated by flow cytometry following the propidium iodide staining protocol kit (eBiosciences). DNA histograms sub G0/G1 fraction indicates apoptotic cells (A), G0/G1, S and G2 by M1, M2 and M3 gating respectively. Percentage of cells are indicated under each histogram. (d) The results shown in the bar diagram are means±SD of 2 individual mice. The PLZF<sup>OFF</sup> expression, associated with loss of PLZF epigenetic function, correlates with the loss of PLZF expression (PLZF knock-out mouse model, Costoya *et al.* 2004) associated with an increased spontaneous apoptosis in the testicular tissue.

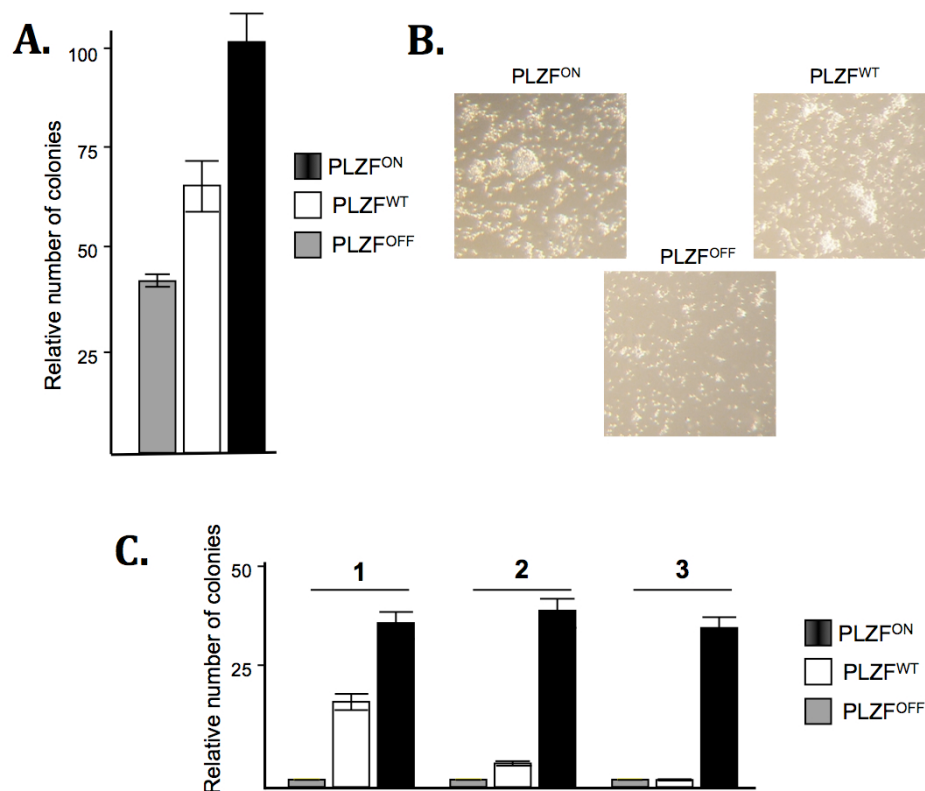

Supplemental Figure S1

**Supplementary Figure S1-2: PLZF acetylation mutants impair self-renewal of bone marrow progenitors.** (A) Whole bone marrow cells from PLZF<sup>ON</sup>, PLZF<sup>OFF</sup> and PLZF<sup>WT</sup> mice were plated in methylcellulose supplemented with cytokines (Methocult M3434). Ten thousand cells were plated per well, in triplicate. Results are mean  $\pm$  SEM from 3 different subtype of mice. Colonies were scored at 12 to 14 days. As seen, bone marrow cells from PLZF<sup>OFF</sup> mice raised fewer colonies than PLZF<sup>ON</sup> or PLZF<sup>WT</sup> bone marrow cells, note that the number of PLZF<sup>ON</sup> mutant colonies have an increase of 25% compared to the PLZF<sup>WT</sup> cells. Number under the histograms are absolute numbers of colonies of a representative experiment. (B) Photomicrograph of CFUs grown in Methocult M3434, magnification x40. (C) For serial replating assay, cells were extracted from methylcellulose, washed and identical cell numbers were replated in Methocult M3434 and the total number of colonies was determined after 10 days. PLZF<sup>WT</sup> bone marrow cells can still induce colonies after 2 rounds of replating, mutant cells from PLZF<sup>OFF</sup> background are not able to form any colony, while PLZF<sup>ON</sup> cells have a self-renewal capacity increased with equal number of colonies after 3 rounds of replating. Number under the histograms are absolute numbers of colonies of a representative experiment

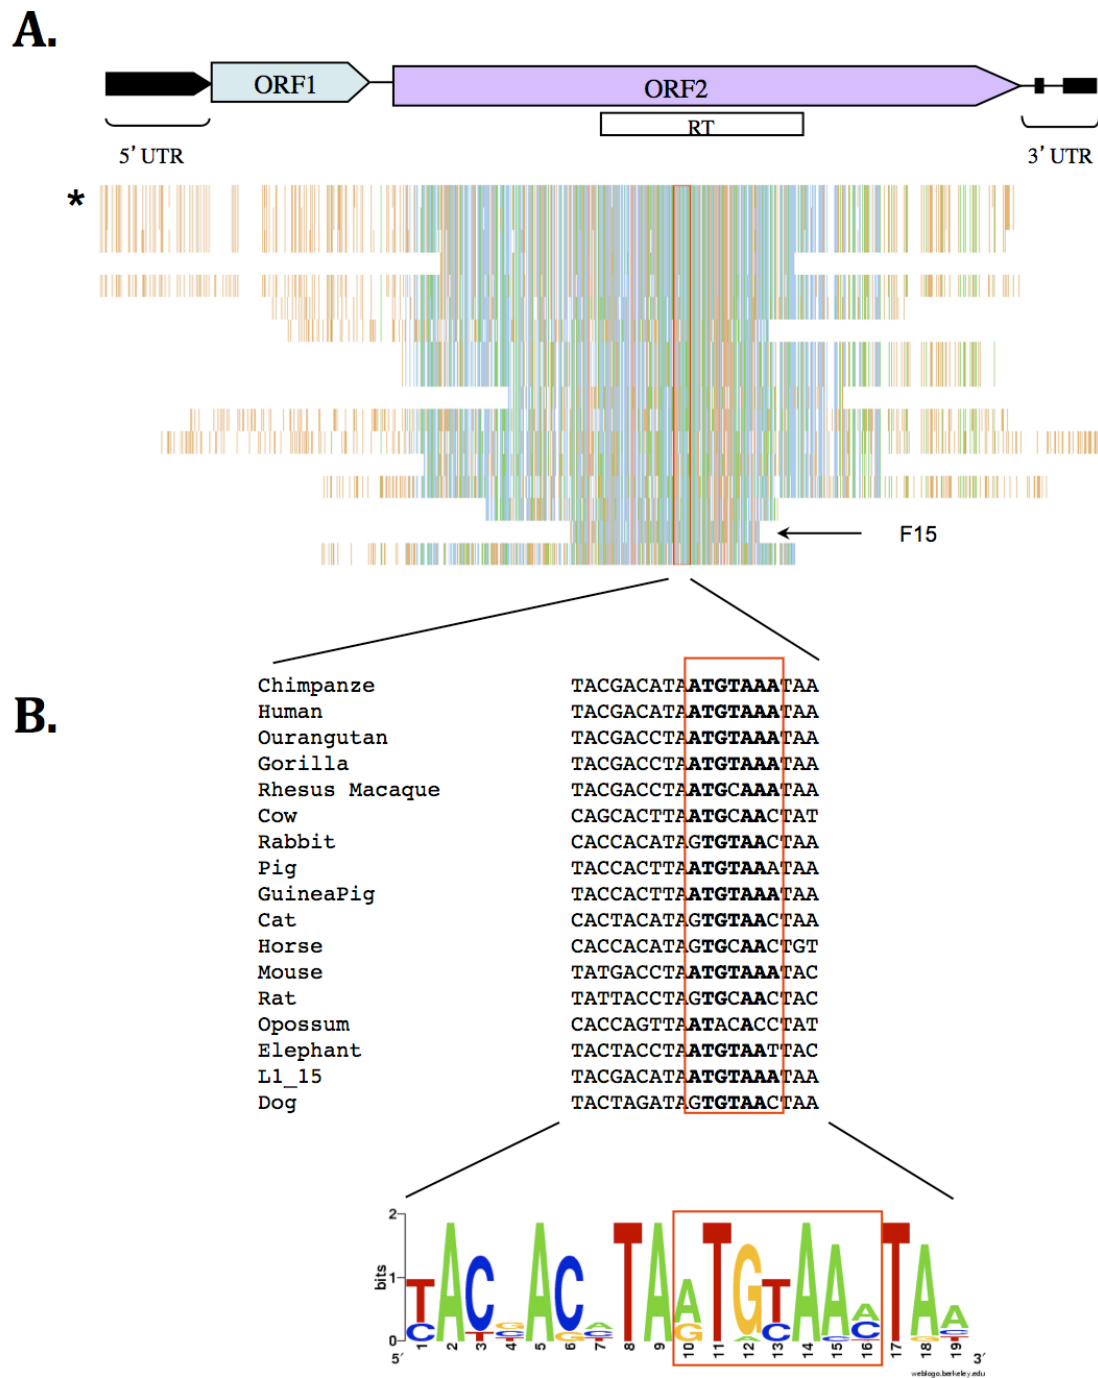

### Supplemental Figure S2: Mammalian L1 elements alignment

(A) Schematic representation of the genomic structure of the human L1 element. Black boxes represent the 5' and 3' untranslated regions (5'UTR and 3' UTR); coloured boxes represent the two open reading frames (ORF1, ORF2). The white box represents the coding sequence of the reverse transcriptase (RT).

Sequence relationships between the chimpanzee (*pan troglodytes*), human (*Homo sapiens*\*), orangutan (*Pongo pygmaeus*), gorilla (*Gorilla gorilla*), macaque (*Macaca mulatta*), cow (*Bos taurus*), rabbit (*Oryctolagus cuniculus*), guinea pig (*Cavia*

*porcellus*), pig (*Sus scrofa*), cat (*Felis catus*), horse (*Equus caballus*), mouse (*mus musculus*), rat (*rattus norvegicus*), opossum (*Monodelphis domestica*), elephant (*Loxodonta africana*), L1\_15 purified sequence and dog (*Canis familiaris*) L1-related sequences. The genomic sequences of the *L1 element* for the respective species were aligned using <http://ebi.ac.uk/clustalW>.

(B) **Alignment of the L1 central region** show that the deduced consensus sequence (using <http://weblogo.berkeley.edu/logo.cgi>) for the PLZF-BS (ATGTAAA, red box) nucleotides are conserved to a lesser degree between mammalian species.

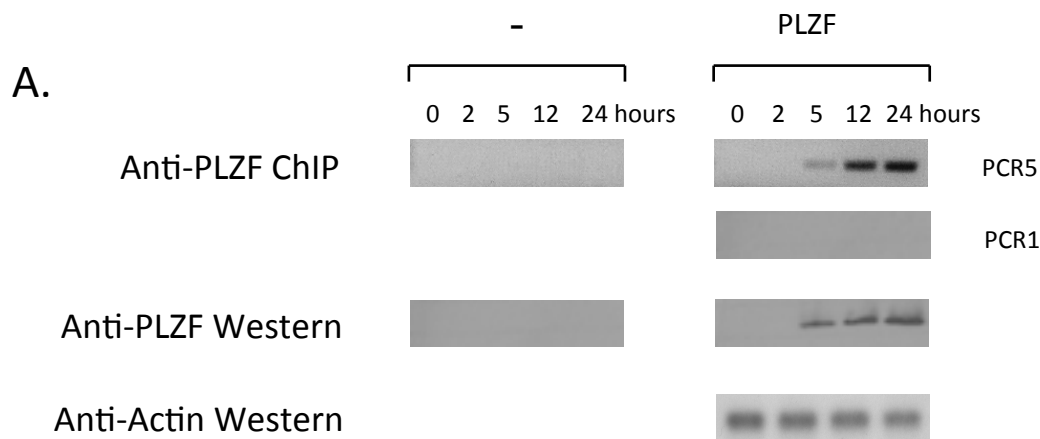

**B.**

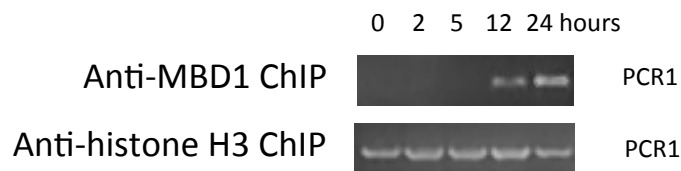

**Supplemental Figure S3: PLZF and MBD1 recruitment to L1 sequences.**

**A. Ectopic expression of PLZF protein is correlated to its L1 DNA binding activity.**

Expression vector for PLZF was transfected into non PLZF-expressing 293T cells. Levels of transiently expressed PLZF were monitored at various time points (0,2,5,12 and 24h) by Western blot analysis using an anti-PLZF (Anti-PLZF Western) antibody and compared to Actin expression (Anti-Actin Western). PLZF DNA binding activity was monitored by ChIP assay using the same antibody (Anti-PLZF ChIP) at the same time points (Anti-PLZF ChIP). As shown in the experiment, when PLZF proteins are detected by Western blot analysis (from 5h onward), PLZF DNA binding is also detected at the site of the PLZF BS localization (PCR5, L1 ORF2) and not at the L1 5'UTR (PCR1) indicating that PLZF interaction with L1 sequences is only through the PLZF BS characterized.

**B. MBD1 recruitment to L1 CpG island.** An antibody against MBD1 (Anti-MBD1) was used to assess the abundance of MBD1 proteins on L1 genomic DNA, in particular within the 5' UTR region containing a CpG island (PCR1, 5'UTR-CpG).

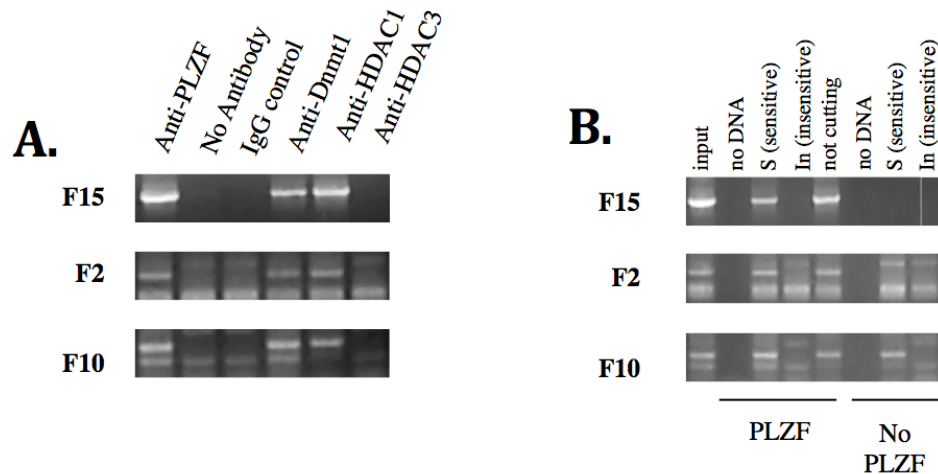

**Supplemental Figure S4: Recruitment of PLZF protein complex to F2, F10 and F15 L1 ChIP-purified fragments.**

**A. PLZF recruits Histone deacetylase and DNA methylase complex to L1 genomic sequences while interacting with F2, F10 and F15 ChIP fragments.** Chromatin prepared from PLZF-expressing haematopoietic KG1 cells was subjected to the ChIP procedure with anti-PLZF and were again precipitated using antibodies shown at the top of the image.

**B. Local methylation status of the L1 PLZF-target sequences (F2, F10 and F15 fragments).** Methylation status was determined by digesting the genomic DNA from 293T cells transfected or not with PLZF expression vector by sensitive (S) and insensitive (In) endonucleases (see Material and methods) behaving differently to DNA methylation. Non cutting endonuclease (XhoI) was also used (not cutting lane) as negative control.

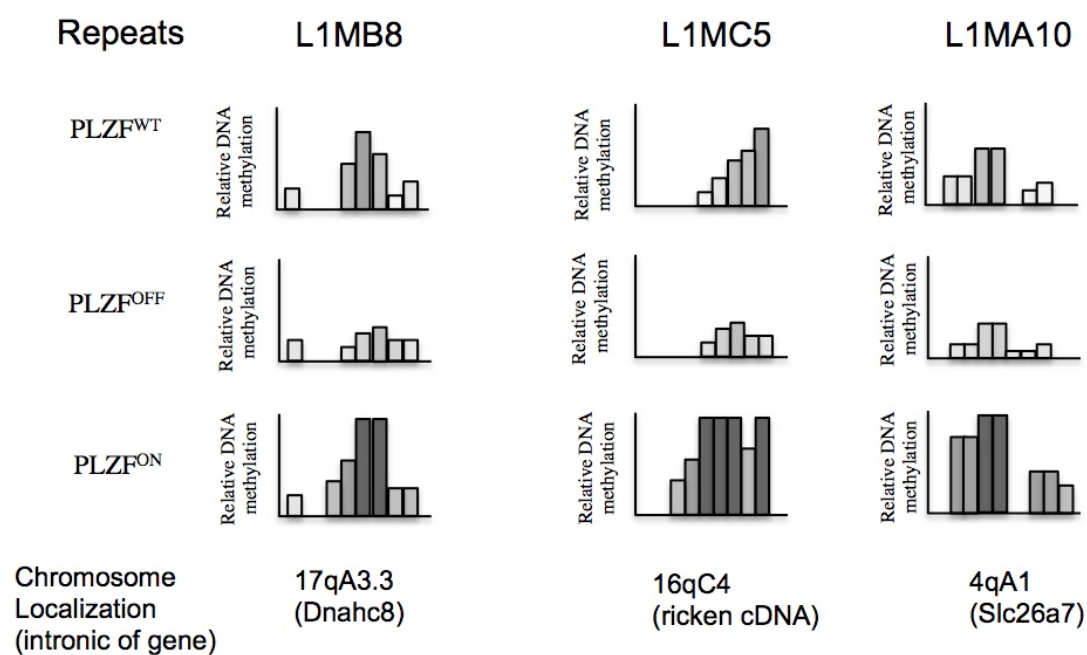

**Supplemental Figure S5: Differential DNA methylation of L1-containing DMRs.**

Examples of found DMRs. 1000bp genomic regions show differences in methylation status using the pipistrelle analysis tool. Hypermethylation (size and darker color of the histograms) is associated with PLZF<sup>WT</sup> and PLZF<sup>ON</sup> mutants in contrast to a decrease of DNA methylation when PLZF<sup>OFF</sup> mutant is expressed.

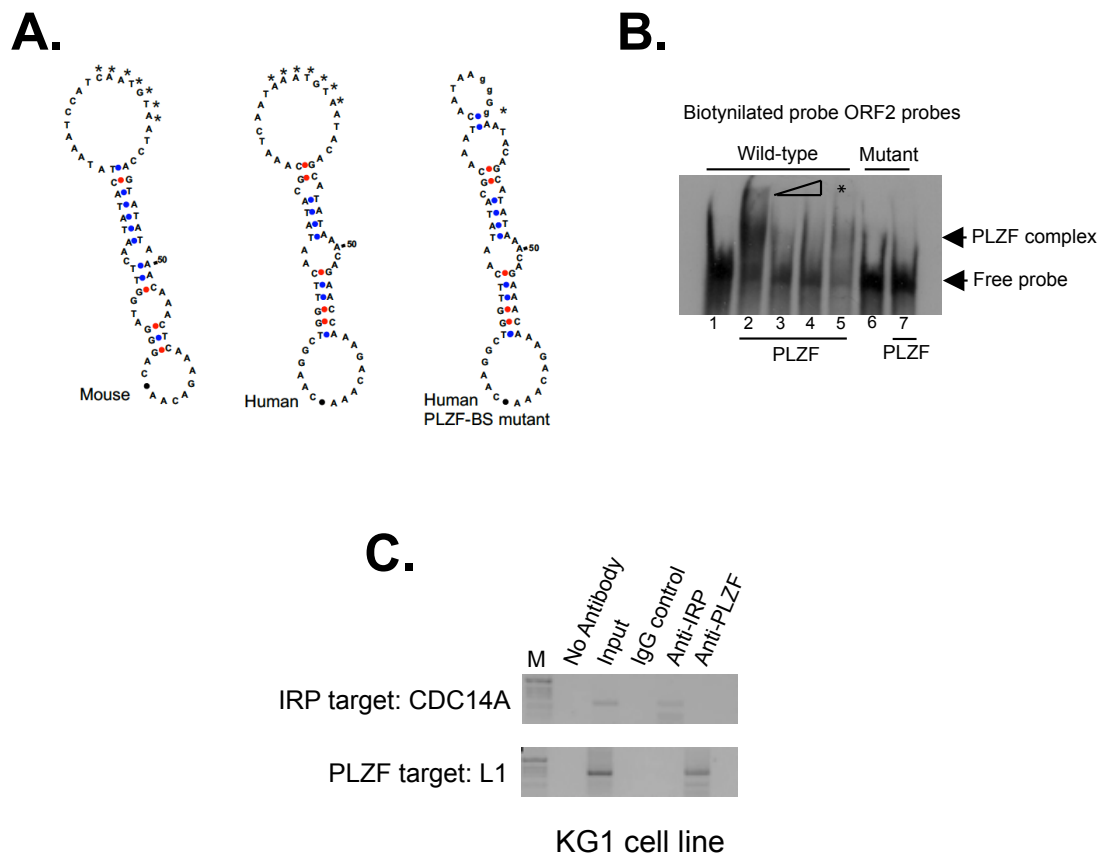

### Supplemental Figure S6: PLZF interacts with L1 mRNAs and regulates their translation

**A. Schematic structure of the mRNA stemloops associated with the PLZF-BS found in human and mouse sequences.** The sequences were processed with mfold software (The Burnet institute, <http://mfold.burnet.edu.au>) and secondary structure are shown. Nucleotides marked with \* are part of the PLZF-BS.

**B. L1 RNA shift assay.** RNA EMSA of wild type and mutant L1 probes were carried out in presence or absence of PLZF protein. Experiments were performed at least 3 times with a representative blot shown. L1 probes were biotinylated and incubated in binding buffer with unprogrammed rabbit reticulocyte (lanes 1 and 6 for wild type or mutant probes) or with rabbit reticulocyte *in vitro* translated PLZF protein (lanes 2 and 7). Competition experiments with increasing amount of unlabelled L1 probes are shown in lanes 3 and 4 and supershift experiment with an anti-PLZF antibody (lane 5 \*) show a loss of PLZF binding to L1 biotinylated probes compared to the PLZF/L1 probe interaction detected in lane 2. No PLZF binding was detected using a L1 mutated probe (lane 7).

### C. Validation of the RNA Pull Down in KG1 cell model (RNA-IP).

Immunoprecipitation of mRNA protein complexes was used to confirm that PLZF was able to bind ORF2 transcript in cell line. As positive control of RNA pull down, IRP protein was used to pull down one of its specific mRNA target CDC14. mRNAs was pull down from KG1 cells according to (3 and described in materials and methods) and RT-PCR was performed on the immunoprecipitated material using CDC14 specific primers. Un-related IgG and anti-PLZF antibodies were used as

negative control. The same procedure was used for ORF2 mRNA pull down by PLZF using anti-IRP and IgG as control antibodies and PCR was performed with specific ORF2 primers. The presence of an amplicon revealed an interaction between the protein of interest and its mRNA target.

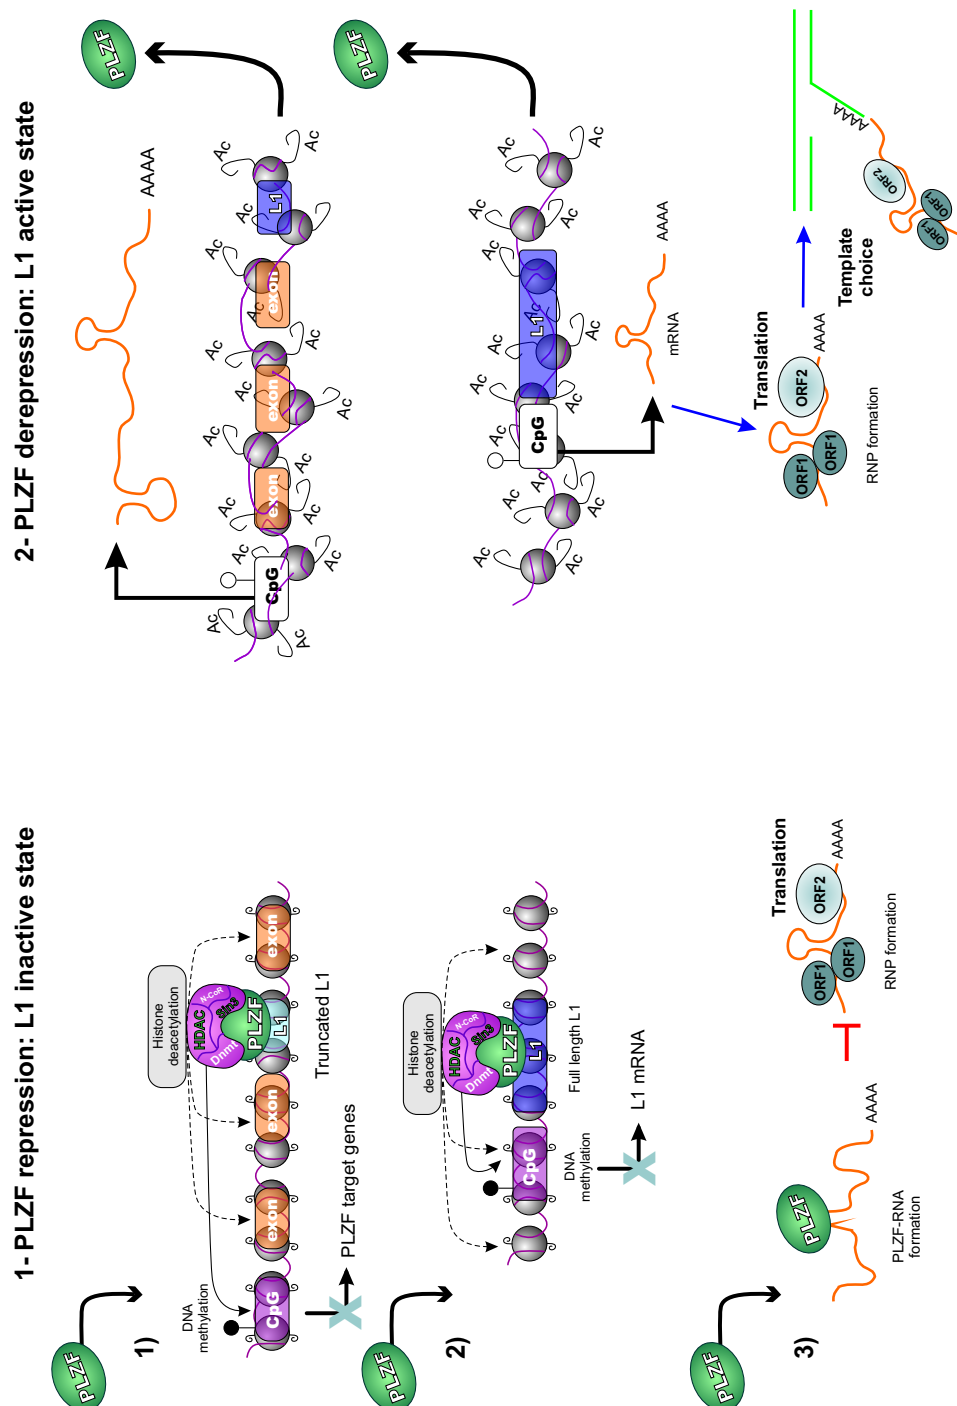

Supplemental Figure S7: Dual regulation of L1 retrotransposon by PLZF

Interaction of PLZF protein to truncated (1) or full length (2) L1 retrotransposon. Under PLZF interaction with DNA genomic sequences, PLZF recruits histone deacetylase (HDAC) and DNA methylase (DNMT) activities in a protein complex including co-repressors (N-CoR and SIN3). Heterochromatin is formed and transcriptional repression occurs unabling expression of L1 mRNAs or surrounding genes (1-PLZF repression: L1 inactive state). Histones are deacetylated and DNA is methylated at CpG islands. PLZF can also interact with L1 mRNAs through a hairpin loop and block the translation of L1 mRNAs to inhibit the formation of L1 RNA particle (RNP), thus stop new L1 insertion events (3). When PLZF is, via specific deacetylation or inactivated in response to cell stress, released from heterochromatin, histone acetylation (Ac) and DNA demethylation (White CpG box) occur, leading to formation of open chromatin, allowing active transcription (2- PLZF derepression: L1 active state) and production of mRNAs from nearby genes and L1 retrotransposon.

Supplemental tables:

Table I: DMR containing L1 sequences

| DMR | Chromosome | L1             | gene position            | L1 (size bp) | other repeats                       |
|-----|------------|----------------|--------------------------|--------------|-------------------------------------|
| 2   | 1 (qB)     | L1M2           | mKIAA112 (intronic)      | 379          | -                                   |
| 3   | 1 (qC1.1)  | L1M5           | MyoIB (intronic)         | 111          | -                                   |
| 6   | 1 (qE1.2)  | L1Md_F2        | mEST AA674321 (intronic) | 1203         | M1_Mm (Alu)                         |
| 7   | 1 (qH2.3)  | L1MB7          | mEST AK080019 (intronic) | 963          | (TATG) <sub>n</sub> (simple repeat) |
| 11  | 2 (qA3)    | Lx8            | mEST AY101367 (intronic) | 151          | RLTR20B4_MM (LTR)                   |
| 15  | 2 (qC1.1)  | L1Md_F2        | intergenic               | 6582*        | -                                   |
| 17  | 2 (qE2)    | L1MB7          | mEST BU842339 (intronic) | 254          | B2 (sine)                           |
| 18  | 2 (qE5)    | HAL1           | Bub1b (intronic)         | 382          | -                                   |
| 21  | 2 (qE5)    | Lx2            | mEST BU555796 (intronic) | 74/1713      | B1_Mus2 (Alu)                       |
| 23  | 2 (qF1)    | L1MC           | Gm14005 (intronic)       | 396          | RSINE1 (sine)                       |
| 26  | 3 (qA1)    | L1MdA          | intergenic               | 1714         | -                                   |
| 27  | 4 (qG1)    | L1ME2z         | intergenic               | 218/261      | RSINE1 (sine)                       |
| 28  | 4 (qE1)    | L1_Mur2        | vpsd13d (intronic)       | 181          | MYSERV6 (LTR)                       |
| 34  | 4 (qE1)    | L1_Mus1        | HMGB1 (intronic)         | 67/347       | B2_Mm2 (sine)                       |
| 35  | 4 (qE1)    | L1_Mur2        | mEST CA533858 (intronic) | 1403         | MT2B (LTR)                          |
| 36  | 5 (qF)     | L2             | intergenic               | 227          | B4 (sine)                           |
| 44  | 5 (qG2)    | HAL1-3A, L1M4C | sdk1 (intronic)          | 83/235       | -                                   |
| 47  | 6 (qG3)    | L1MA4A         | Sox5 (3')                | 879/410      | -                                   |
| 48  | 7 (qA3)    | MusHAL1        | Plaur (intronic)         | 1754         | -                                   |
| 53  | 7 (qA3)    | Lx4            | CYP2b13 (intronic)       | 1697         | -                                   |
| 56  | 7 (qA3)    | L1_Mus2, Lx4B  | CYP2b13 (3')             | 518,794      | -                                   |

|     |            |                     |                          |                |                         |
|-----|------------|---------------------|--------------------------|----------------|-------------------------|
| 58  | 7 (qB2)    | L1MA4               | mRNA AK181724 (intronic) | 949            | -                       |
| 59  | 7 (qB2)    | L1Mus4              | mEST CA464463 (intronic) | 747            | -                       |
| 63  | 7 (qC)     | Lx8                 | Lrrk1 (intronic)         | 533            | -                       |
| 67  | 8 (qC4)    | Lx9                 | mESTCJ046943 (intronic)  | 504            | -                       |
| 73  | 8 (qA1.1)  | L1M18               | ATP11a (intronic)        | 187            | RSINE1 (sine)           |
| 75  | 9 (qA5.3)  | L1MA5               | Gria4 (intronic)         | 1953           | -                       |
| 79  | 9 (qA5.3)  | L1MB3               | intergenic               | 662            | -                       |
| 80  | 9 (qA5.3)  | L1_Mus3             | intergenic               | 6657*          | -                       |
| 83  | 9 (qF1)    | L1M3                | Cpne4 (intronic)         | 453            | -                       |
| 89  | 9 (qF3)    | Lx7                 | intergenic               | 1489           | B4 (sine)               |
| 91  | 10 (qB2)   | L1MEf               | NSMUST0000009932         | 360            | B1_Mus1 (sine)          |
| 95  | 10 (qC2)   | L1_Mur2             | Anks1b (intronic)        | 2654           | B1_Mus1 (sine)          |
| 96  | 10 (qC2)   | HAL1                | Anks1b (intronic)        | 67             | B1F1 (Alu)              |
| 97  | 10 (qC2)   | Lx5                 | Anks1b (intronic)        | 349            | -                       |
| 98  | 10 (qC2)   | HAL1-3A             | Tmcc3 (intronic)         | 65             | B4a (sine)              |
| 99  | 10 (qD1)   | L1Mb7               | Poc1b (intronic)         | 987            | -                       |
| 100 | 11 (qB1.3) | Lx7, Lx8            | intergenic               | 485,255        | (CA)n (simple repeat)   |
| 105 | 11 (qB1.3) | L1_Mur1, L1MC1      | Slc25a21 (intronic)      | 96,77          | B1_Mm (sine)            |
| 107 | 12 (qC1)   | Lx9                 | intergenic               | 744            | B1_Mus1 (Alu)           |
| 110 | 13 (qC3)   | L1MC1               | Rasa1 (intronic)         | 794            | -                       |
| 116 | 13 (qC3)   | Lx5, L1MdF2         | Naip 6 and Naip 7 (3')   | 1153,587       | -                       |
| 118 | 14 (qA)    | Lx                  | Acox2 (intronic)         | 2979           | B1_Mus1 (Alu)           |
| 125 | 14 (qC1)   | L1MB3               | mEST BY716586 (intronic) | 315            | Rsine1 (sine)           |
| 128 | 14 (qD1)   | L1M2                | Ebp1 (intronic)          | 1806           | -                       |
| 130 | 15 (qB3.1) | L1Md_F2, L1MC4, Lx7 | Sem5a (intronic)         | 2366,685,6293* | -                       |
| 132 | 16 (qB3)   | L1Md_F2             | intergenic               | 2083           | -                       |
| 137 | 17 (qA3.3) | L2A                 | Grm4 (intronic)          | 212            | B1_Mur4 (sine)          |
| 150 | 17 (qA3.3) | Lx7                 | btbd9 (intronic)         | 471            | -                       |
| 151 | 17 (qA3.3) | L1_Mus1             | Dnahe8 (intronic)        | 481            | REMER17B (LTR)          |
| 158 | 17 (qA3.3) | Lx6                 | Dnahe8 (intronic)        | 653            | -                       |
| 160 | 17 (qA3.3) | Lx9                 | Dnahe8 (intronic)        | 182            | -                       |
| 165 | 17 (qA3.3) | L1Ma6               | Dnahe8 (intronic)        | 297            | -                       |
| 167 | 17 (qA3.3) | Lx6                 | Dnahe8 (intronic)        | 161            | -                       |
| 169 | 17 (qA3.3) | L1MB5               | Dnahe8 (intronic)        | 189            | B1F (Alu)               |
| 173 | 17 (qB1)   | L1_Mus1             | H2-t3 (3')               | 382            | -                       |
| 174 | 17 (qB3)   | L1_Mus1             | Cyp39a1 (3')             | 366            | -                       |
| 177 | 18 (qA1)   | L1_Mus1             | MEST CD354501 (intronic) | 313            | orrD1 (LTR)             |
| 179 | 18 (qA2)   | Lx8                 | Asx13 (intronic)         | 178            | -                       |
| 182 | 18 (qE3)   | L1MA4               | Loxhd1 (intronic)        | 6596*          | -                       |
| 188 | 19 (qD3)   | L1M5, Lx9           | intergenic               | 156,106        | (TCCA)n (simple repeat) |

\* full length L1

Table II: ChIP-purified L1 targets

| Clone | Chromosome  | L1                 | Gene (position)      | ChIP purified fragment size (bp) | Other repeats                                       |
|-------|-------------|--------------------|----------------------|----------------------------------|-----------------------------------------------------|
| F2    | 10 (q25.3)  | L1MA6int*/L1ME3B   | ATRNL1 (intronic)    | 2206                             | AluYb8 (sine)                                       |
| F3    | 22 (q12.1)  | L1M3               | ADRBK1 (last intron) | 1402                             | AluSz/AluY (sine), (T) <sub>n</sub> (simple repeat) |
| F6    | 6 (q21)     | L1PA4              | POPDC3 (last intron) | 675                              | -                                                   |
| F7    | 8 (q24.13)  | L1PA16,L1P2,L1Me3A | BC952578 (3'UTR)     | 3315                             | AluSg/AluSz6 (sine)                                 |
| F10   | 10 (q31.1)  | L1PA2,L1MA5int     | BU168212 (intronic)  | 2171                             | AluSz (sine)                                        |
| F11   | 5 (p14.3)   | L1PA5              | CDH18 (last intron)  | 3520                             | AluSx1/AluJo (sine)                                 |
| F12   | 12 (q12.2)  | L1MCA4             | SEC14L2 (intronic)   | 2531                             | MIR3/AluJo (sine)                                   |
| F13   | 19 (p13.11) | L2a                | KCNN1 (intronic)     | 696                              | -                                                   |
| F14   | 12 (q24.21) | L1M5*,L1MA8        | L13705 (intronic)    | 2959                             | HAL1b, THE1C (ERV <sub>L</sub> _MaLR)               |
| F15   | 10 (q23.1)  | L1PA3*, LIPB4 int  | intergenic           | 1260                             | L1M2                                                |
| F16   | 1 (p34.3)   | L1ME1*             | intergenic           | 4012                             | MSTB (ERV <sub>L</sub> _MaLR)                       |
| F18   | 13 (q22.33) | L1ME3B             | MZT1 (intronic)      | 1387                             | MLT1Bint (ERV <sub>L</sub> _MaLR), Alu Sq2 (sine)   |
| F21   | 3 (p13)     | L1PA3              | intergenic           | 1634                             | MLT1J (ERV <sub>L</sub> _MaLR)                      |
| F23   | 10 (q25.1)  | L1ME3A             | SLC9A40 (intronic)   | 383                              | -                                                   |
| F25   | 5 (q15)     | L1PA13             | intergenic           | 2263                             | -                                                   |
| F28   | 3 (q25.32)  | L1PA13             | intergenic           | 1338                             | AluSx (sine)                                        |
| F29   | 9 (p21.1)   | L2a                | NDUFB6 (intronic)    | 788                              | L1MC4                                               |
| F30   | 14 (q13.2)  | L2C                | PSMA6 (intronic)     | 649                              | AluS2 (Sine)                                        |

\* full length L1

int: interrupted
