# Supplementary material
Source: PubMed Central journal article supplement (PMC3981173)

Figure 2D

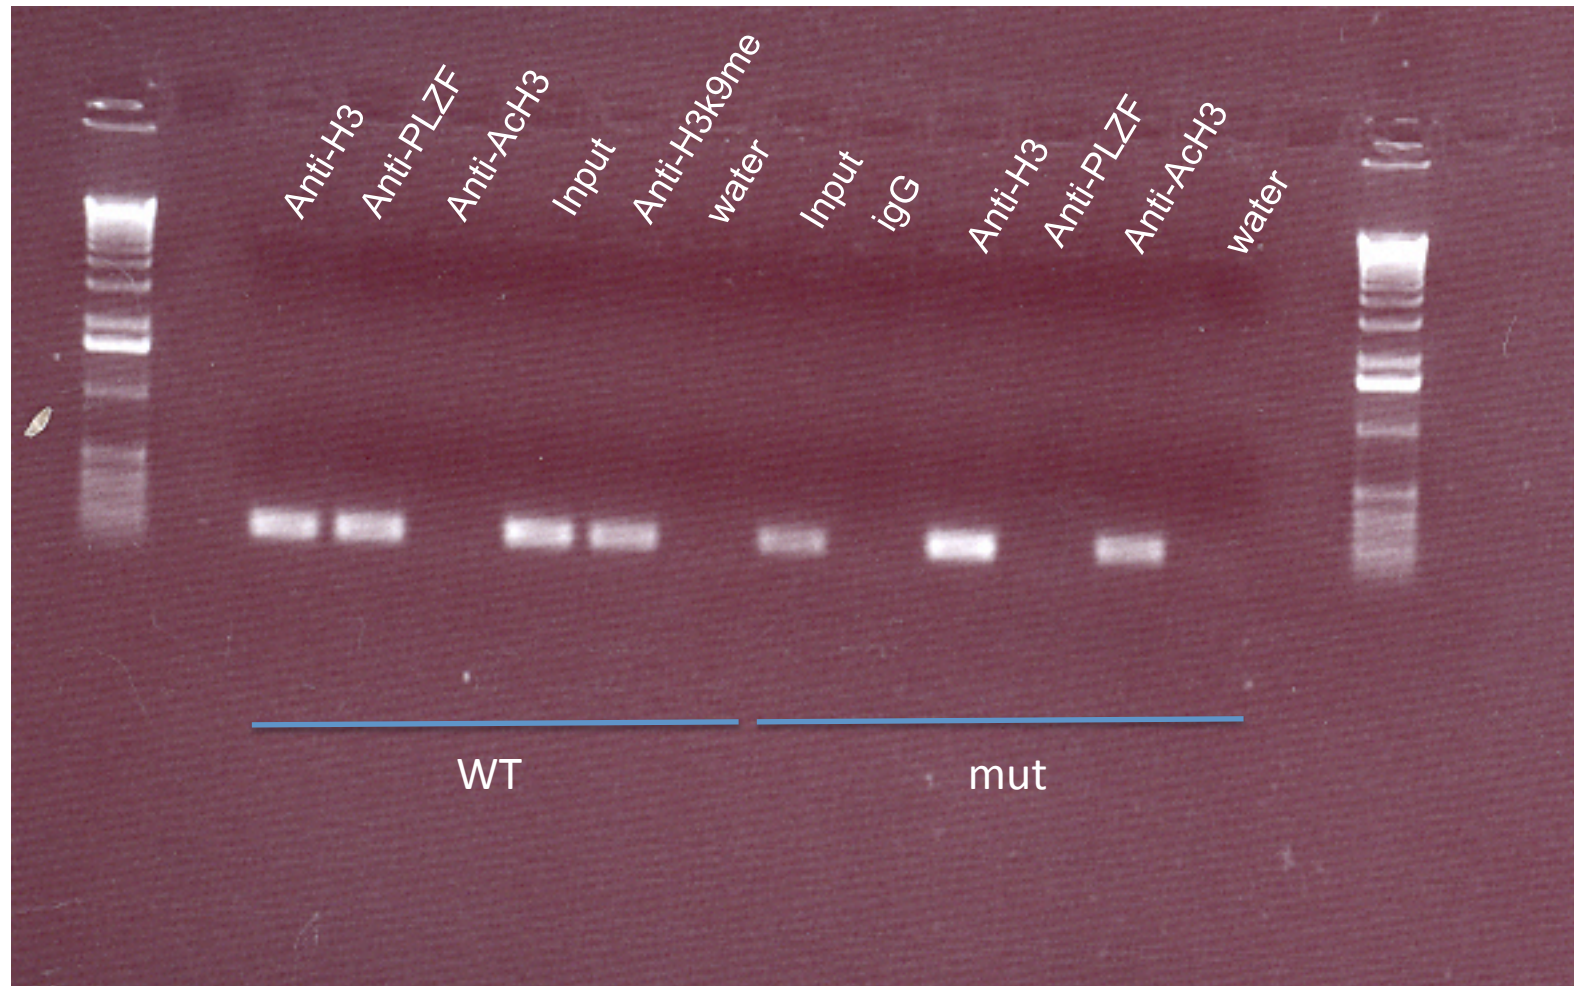

Supplement: emboj2013118df2d.pdf [file emboj2013118df2d.pdf]

Figure 5 A

Bone marrow

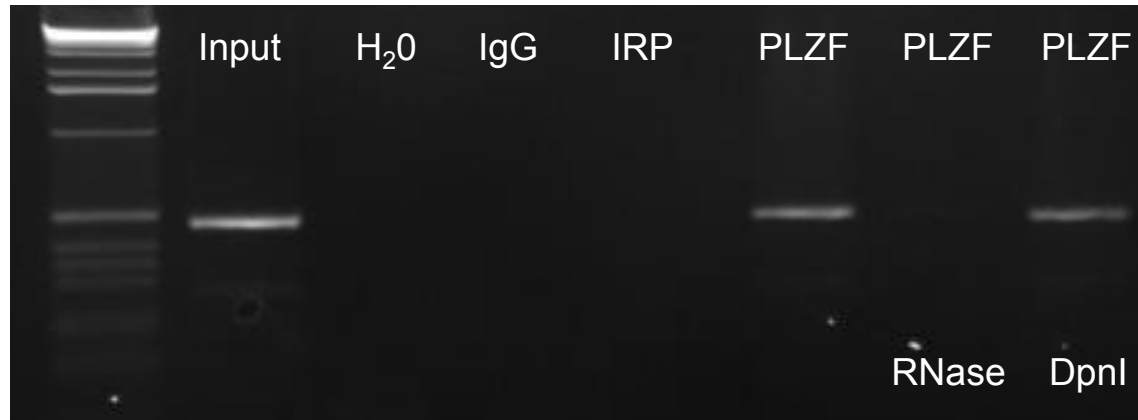

Testis

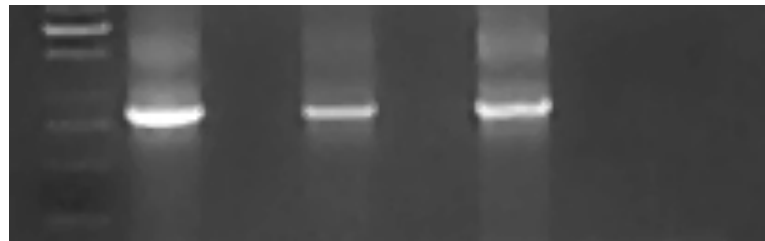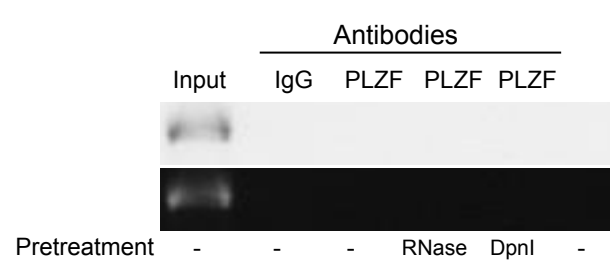

Muscle

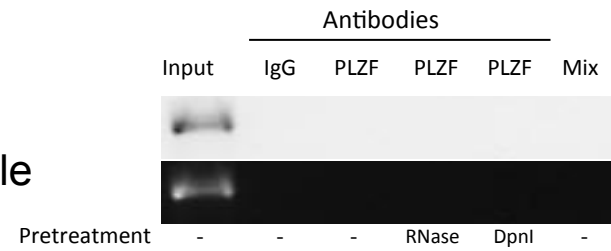

Stomach

Supplement: emboj2013118df5a.pdf [file emboj2013118df5a.pdf]

Figure 5 B

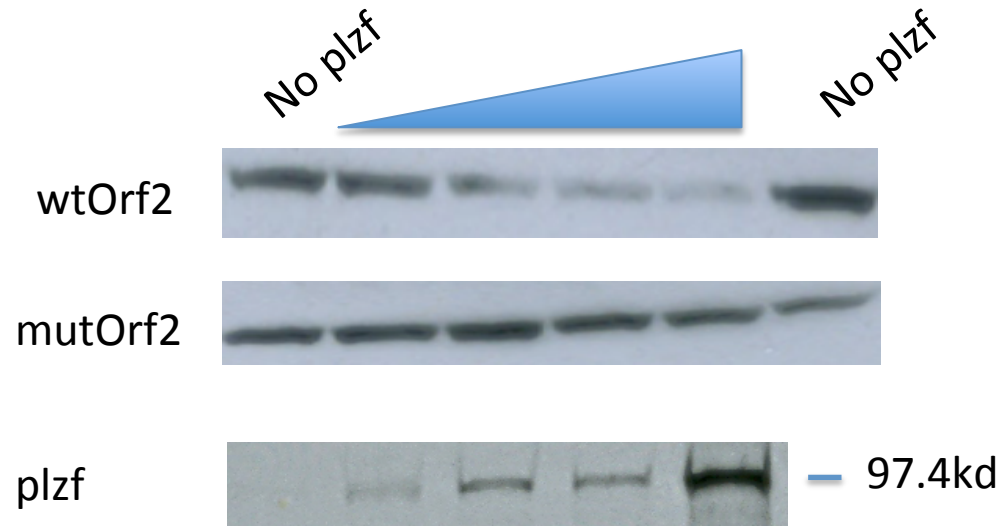

Supplement: emboj2013118df5b.pdf [file emboj2013118df5b.pdf]
